# Supplementary material for: Multiscale Mechano-Biological Finite Element Modelling of Oncoplastic Breast Surgery—Numerical Study towards Surgical Planning and Cosmetic Outcome Prediction
Source: PubMed Central journal article supplement (PMC4965022; doi:10.1371/journal.pone.0159766), 2016-07-28
Supplement: pone.0159766.s003.pdf [file pone.0159766.s003.pdf]

---

## SUPPORTING INFORMATION

# Multiscale Mechano-biological Finite Element Modelling of Oncoplastic Breast Surgery – Numerical Study Towards Surgical Planning and Cosmetic Outcome Prediction

V. Vavourakis, B. Eiben, J.H. Hipwell, N.R. Williams, M. Keshtgar, D.J. Hawkes

## Implementation of the Multiscale Mechano-biological FE Framework

The proposed multiscale mechano-biological Finite Element (FE) framework has been incorporated into the existing in-house numerical analysis framework *FEB3* – pronounced *Phoebe* – which is freely available upon request from: <https://bitbucket.org/vasvav/feb3-finite-element-bioengineering-in-3d/wiki/Home>. The FE computational framework has been implemented in an object-oriented, scalable, C++ code that incorporates several open-source numerical libraries:

- *blitz++*<sup>1</sup> is a meta-template library in C++ which was utilised in *FEB3* for tensor algebra and multi-dimensional tensor manipulation [1].
- *GNU Scientific Library* is an ANSI-C library that contains a wide range of mathematical routines (over 1000 in total) such as random number generators, special functions, statistics, numerical differentiation, data fitting, etc. (see online documentation: [https://www.gnu.org/software/gsl/manual/html\\_node/](https://www.gnu.org/software/gsl/manual/html_node/)) [2].
- *METIS*<sup>2</sup> and *ParMETIS*<sup>3</sup> is a pair of libraries containing established algorithms for partitioning graphs, partitioning finite element meshes and producing fill-reducing orderings for sparse matrices, in serial and in parallel computing respectively [3].
- *MPICH*<sup>4</sup> is a standardized and portable message-passing system which is a communication protocol for programming parallel computers.
- *PETSc*<sup>5</sup> is a suite of data structures and routines for the solution of scientific applications, and is used within *FEB3* in solving linear and nonlinear systems [4, 5]. *PETSc* is also integrated with *MPICH* to facilitate parallel computations, while it communicates with *METIS* and *ParMETIS* for sparse system partitioning.
- *libMesh*<sup>6</sup> [6] is the top-level library used by *FEB3*. *libMesh* is an object-oriented C++ framework for the numerical simulation of partial differential equations using arbitrary unstructured discretisations on serial and parallel platforms, while it integrates with high-performance computing libraries such as *PETSc*.

---

<sup>1</sup><http://sourceforge.net/projects/blitz/>

<sup>2</sup><http://glaros.dtc.umn.edu/gkhome/metis/metis/overview>

<sup>3</sup><http://glaros.dtc.umn.edu/gkhome/metis/parmetis/overview>

<sup>4</sup>[www.mpich.org](http://www.mpich.org)

<sup>5</sup><http://www.mcs.anl.gov/petsc/>

<sup>6</sup><http://libmesh.github.io/>

---

## References

1. Veldhuizen T. Blitz++ User's Guide: A C++ class library for scientific computing; 2006. Available from: <http://blitz.sourceforge.net/resources/blitz-0.9.pdf>.
2. Galassi M, Davies J, Thailer J, Gough B, Jungman G, Alken P, et al.. GNU Scientific Library Reference Manual; 2013. Available from: <http://www.gnu.org/software/gsl/>.
3. Karypis G, Kumar V. MeTis: Unstructured Graph Partitioning and Sparse Matrix Ordering System, Version 4.0; 2009. <http://www.cs.umn.edu/~metis>.
4. Balay S, Gropp WD, McInnes LC, Smith BF. Efficient Management of Parallelism in Object Oriented Numerical Software Libraries. In: Arge E, Bruaset AM, Langtangen HP, editors. Modern Software Tools in Scientific Computing. Birkhäuser Press; 1997. p. 163–202.
5. Balay S, Abhyankar S, Adams MF, Brown J, Brune P, Buschelman K, et al. PETSc Users Manual. Argonne National Laboratory; 2014. ANL-95/11 - Revision 3.5. Available from: <http://www.mcs.anl.gov/petsc>.
6. Kirk BS, Peterson JW, Stogner RH, Carey GF. libMesh: A C++ Library for Parallel Adaptive Mesh Refinement/Coarsening Simulations. Engineering with Computers. 2006;22(3–4):237–254.
