# Supplementary material for: Multiscale Mechano-Biological Finite Element Modelling of Oncoplastic Breast Surgery—Numerical Study towards Surgical Planning and Cosmetic Outcome Prediction
Source: PubMed Central journal article supplement (PMC4965022; doi:10.1371/journal.pone.0159766), 2016-07-28
Supplement: pone.0159766.s007.pdf [file pone.0159766.s007.pdf]

---

## SUPPORTING INFORMATION

### Multiscale Mechano-biological Finite Element Modelling of Oncoplastic Breast Surgery – Numerical Study Towards Surgical Planning and Cosmetic Outcome Prediction

V. Vavourakis, B. Eiben, J.H. Hipwell, N.R. Williams, M. Keshtgar, D.J. Hawkes

#### Wound Healing and Angiogenesis Model Parameters

List of all the parameters used in the biochemical finite element breast model, and references to the published papers are also provided.

| Parameter         | Value                                                            | Source           |
|-------------------|------------------------------------------------------------------|------------------|
| $D_\eta$          | $5.962 \times 10^{-6} \text{ cm}^2 \text{ d}^{-1}$               | [1]              |
| $\eta_0$          | $9. \times 10^8 \text{ cell cm}^{-3}$                            | [2]              |
| $k_\zeta$         | $2.16 \times 10^8 \text{ cm}^3 \text{ cell}^{-1} \text{ d}^{-1}$ | Adapted from [1] |
| $k$               | $0.24 \text{ d}^{-1}$                                            | [1]              |
| $D_\varsigma$     | $50.976 \times 10^{-3} \text{ cm}^2 \text{ d}^{-1}$              | [1]              |
| $\varsigma_0$     | $10^{-8} \text{ g cm}^{-3}$                                      | Adapted from [3] |
| $\ell_\eta$       | $1.33 \times 10^{-16} \text{ g cell}^{-1} \text{ d}^{-1}$        | [1]              |
| $\ell$            | $1.20 \text{ d}^{-1}$                                            | [1]              |
| $\bar{\varsigma}$ | $4. \times 10^{-7} \text{ g cm}^{-3}$                            | [1]              |
| $h_0$             | 10. –                                                            | [1]              |
| $h_1; h_2$        | 9.47 –; 0.53 –                                                   | Adapted from [1] |
| $\nu_0$           | 70. $\text{cm}^{-1}$                                             | [4]              |
| $\beta$           | $2.857 \times 10^{-3} \text{ cm d}^{-1}$                         | Adapted from [1] |
| $D_\xi$           | $4.32 \times 10^{-3} \text{ cm}^2 \text{ d}^{-1}$                | [3]              |
| $\lambda_\nu$     | $1.143 \times 10^{-2} \text{ cm d}^{-1}$                         | Adapted from [5] |
| $\lambda$         | $0.8 \text{ d}^{-1}$                                             | Adapted from [5] |
| $D_\mu$           | $8.64 \times 10^{-2} \text{ cm}^2 \text{ d}^{-1}$                | [3]              |
| $\mu_0$           | $10^{-8} \text{ g cm}^{-3}$                                      | [6]              |
| $\phi_\xi$        | $10^{-8} \text{ g cm}^{-3} \text{ d}^{-1}$                       | Adapted from [3] |
| $\phi$            | $0.95 \text{ d}^{-1}$                                            | Adapted from [3] |
| $\hat{\xi}$       | 0.5 –                                                            | [7]              |
| $\bar{\xi}$       | 0.8 –                                                            | Estimated        |

---

## References

1. Sherratt JA, Murray JD. Mathematical analysis of a basic model for epidermal wound healing. *Journal of Mathematical Biology*. 1991;29(5):389–404.
2. Tsuji W, Rubin JP, Marra KG. Adipose-derived stem cells: Implications in tissue regeneration. *World Journal of Stem Cells*. 2014;6(3):312–321.
3. Valero C, Javierre E, García-Aznar JM, Gómez-Benito MJ. Numerical modelling of the angiogenesis process in wound contraction. *Biomechanics and Modeling in Mechanobiology*. 2013;12(2):349–360.
4. Hilmas DE, Gillette EL. Morphometric analyses of the microvasculature of tumors during growth and after X-irradiation. *Cancer*. 1974;33(1):103–110.
5. Javierre E, Moreo P, Doblaré M, García-Aznar JM. Numerical modeling of a mechano-chemical theory for wound contraction analysis. *International Journal of Solids and Structures*. 2009;46(20):3597–3606.
6. Olsen L, Sherratt JA, Maini PK. A Mechanochemical Model for Adult Dermal Wound Contraction and the Permanence of the Contracted Tissue Displacement Profile. *Journal of Theoretical Biology*. 1995;177(2):113–128.
7. Xue C, Friedman A, Sen CK. A mathematical model of ischemic cutaneous wounds. *Proceedings of the National Academy of Sciences*. 2009;106(39):16782–16787.
