# Supplementary material for: Multiscale Mechano-Biological Finite Element Modelling of Oncoplastic Breast Surgery—Numerical Study towards Surgical Planning and Cosmetic Outcome Prediction
Source: PubMed Central journal article supplement (PMC4965022; doi:10.1371/journal.pone.0159766), 2016-07-28
Supplement: pone.0159766.s008.pdf [file pone.0159766.s008.pdf]

---

## SUPPORTING INFORMATION

### Multiscale Mechano-biological Finite Element Modelling of Oncoplastic Breast Surgery – Numerical Study Towards Surgical Planning and Cosmetic Outcome Prediction

V. Vavourakis, B. Eiben, J.H. Hipwell, N.R. Williams, M. Keshtgar, D.J. Hawkes

#### Soft Tissue Biomechanics Model Parameters

List of all the parameters used in the biomechanical finite element breast model, and references to the published papers are also provided.

| Parameter                                          | Value                                         | Source                      |
|----------------------------------------------------|-----------------------------------------------|-----------------------------|
| $c_{1,\text{adipose}}; c_{2,\text{adipose}}$       | 80. Pa; 0. Pa                                 | [1, 2]                      |
| $c_{1,\text{fibrogland}}; c_{2,\text{fibrogland}}$ | 120. Pa; 0. Pa                                | [1, 2]                      |
| $c_{1,\text{recover}}; c_{2,\text{recover}}$       | 300. Pa; 0. Pa                                | Estimated                   |
| $\kappa$                                           | 20. kPa                                       | Incompressibility Parameter |
| $\rho_{0,\text{adipose}}$                          | 910. kg m <sup>-3</sup>                       | [3]                         |
| $\rho_{0,\text{fibrogland}}$                       | 1020. kg m <sup>-3</sup>                      | Adapted from [4]            |
| $\rho_{0,\text{recover}}$                          | 1000. kg m <sup>-3</sup>                      | Estimated                   |
| $\alpha_s; \beta_s$                                | 92.4 Pa; 4.4 –                                | [5]                         |
| $c_{2,\text{skin}}$                                | –203.4 Pa                                     | [5]                         |
| $\rho_{0,\text{skin}}$                             | 1060. kg m <sup>-3</sup>                      | [5]                         |
| $\tau_f$                                           | $1.25 \times 10^{-5}$ N cm cell <sup>-1</sup> | Adapted from [6]            |
| $\alpha_f$                                         | 1. –                                          | Adapted from [7]            |
| $\eta_{0,f}$                                       | $10^4$ cell cm <sup>-3</sup>                  | [6]                         |

#### References

1. del Palomar AP, Calvo B, Herrero J, López J, Doblaré M. A finite element model to accurately predict real deformations of the breast. *Medical Engineering & Physics*. 2008;30(9):1089–1097.
2. Tanner C, Schnabel JA, Hill DLG, Hawkes DJ, Leach MO, Hose DR. Factors influencing the accuracy of biomechanical breast models. *Medical Physics*. 2006;33(6):1758–1769.
3. Farvid MS, Ng TW, Chan DC, Barret PH, Watts GF. Association of adiponectin and resistin with adipose tissue compartments, insulin resistance and dyslipidaemia. *Diabetes, Obesity & Metabolism*. 2005;7(4):406–413.

- 
4. Han L, Hipwell JH, Tanner C, Taylor Z, Mertzaniidou T, Cardoso J, et al. Development of patient-specific biomechanical models for predicting large breast deformation. *Physics in Medicine and Biology*. 2012;57(2):455–472.
  5. Veronda DR, Westmann RA. Mechanical characterization of skin – Finite deformations. *Journal of Biomechanics*. 1970;3(1):111–124.
  6. Olsen L, Sherratt JA, Maini PK. A Mechanochemical Model for Adult Dermal Wound Contraction and the Permanence of the Contracted Tissue Displacement Profile. *Journal of Theoretical Biology*. 1995;177(2):113–128.
  7. Javierre E, Moreo P, Doblaré M, García-Aznar JM. Numerical modeling of a mechano-chemical theory for wound contraction analysis. *International Journal of Solids and Structures*. 2009;46(20):3597–3606.
